# Supplementary material for: The role of MMP-14 in ovarian cancer: a systematic review
Source: PubMed Central journal article supplement (PMC8336022; doi:10.1186/s13048-021-00852-7), 2021-08-03
Supplement: 13048_2021_852_MOESM1_ESM.pdf [file 13048_2021_852_MOESM1_ESM.pdf]

Appendix 1. Search strategy for MMP-14 and ovarian cancer.

|                     |                     |                                                                                                                                                                                                                                                                                                                                                                                                                                                                                                                                                                                                                                                                                                                                                                                                 |                        |
|---------------------|---------------------|-------------------------------------------------------------------------------------------------------------------------------------------------------------------------------------------------------------------------------------------------------------------------------------------------------------------------------------------------------------------------------------------------------------------------------------------------------------------------------------------------------------------------------------------------------------------------------------------------------------------------------------------------------------------------------------------------------------------------------------------------------------------------------------------------|------------------------|
| <a href="#">#12</a> | <a href="#">Add</a> | Search (#11) AND #9                                                                                                                                                                                                                                                                                                                                                                                                                                                                                                                                                                                                                                                                                                                                                                             | <a href="#">92</a>     |
| <a href="#">#11</a> | <a href="#">Add</a> | Search (Ovarian Neoplasms [Mesh]) OR (Ovarian Neoplasm [tiab] OR Ovary Neoplasms [tiab] OR Ovary Neoplasm [tiab] OR Ovary Cancer [tiab] OR Ovary Cancers [tiab] OR Ovarian Cancer [tiab] OR Ovarian Cancers [tiab] OR Cancer of Ovary [tiab] OR Cancer of the Ovary [tiab] OR tumors of the ovaries [tiab] OR Tumor of the ovary [tiab] OR Tumors of the Ovary [tiab] OR Tumors of the ovary [tiab] OR ovarian neoplasm [tiab] OR ovary neoplasms [tiab] OR ovary neoplasm [tiab] OR ovary cancers [tiab] OR ovarian cancer [tiab] OR ovarian cancers [tiab] OR cancer of ovary [tiab] OR cancer of the ovary [tiab] OR tumor of the ovary [tiab] OR tumors of the ovary [tiab] OR tumours of the ovary [tiab] OR tumour of the ovary [tiab])                                                   | <a href="#">116350</a> |
| <a href="#">#9</a>  | <a href="#">Add</a> | Search ((MMP-14 Metalloproteinase [TIAB] OR MMP 14 Metalloproteinase [TIAB] OR MT1-MMP [TIAB] OR MMP14 Metalloproteinase [TIAB] OR Metalloproteinase, MMP14 [TIAB])) OR (Matrix Metalloproteinase 14"[Mesh] OR Metalloproteinase 14, Matrix [TIAB] OR 'MMP-14 Metalloproteinase' [TIAB] OR MMP 14 Metalloproteinase [TIAB] OR Metalloproteinase, MMP-14 [TIAB] OR MMP14 Metalloproteinase [TIAB] OR MT-MMP-1 [TIAB] OR MT1-Matrix Metalloproteinase [TIAB] OR MMP-14 [tiab])) AND (Search ("Matrix Metalloproteinase 14"[Mesh] OR Metalloproteinase 14, Matrix [TIAB] OR 'MMP-14 Metalloproteinase' [TIAB] OR MMP 14 Metalloproteinase [TIAB] OR Metalloproteinase, MMP-14 [TIAB] OR MMP14 Metalloproteinase [TIAB] OR MT-MMP-1 [TIAB] OR MT1-Matrix Metalloproteinase [TIAB] OR MMP-14 [tiab]) | <a href="#">5092</a>   |
